# Supplementary material for: Model study of the impacts of future climate change on the hydrology of Ganges–Brahmaputra–Meghna basin
Source: Copernicus journal article supplement (doi:10.5194/hess-19-747-2015), 2015-02-04
Supplement: Supplementary file 1 [file hess-19-747-2015-supplement.pdf]

Supplement of Hydrol. Earth Syst. Sci., 19, 747–770, 2015  
<http://www.hydrol-earth-syst-sci.net/19/747/2015/>  
doi:10.5194/hess-19-747-2015-supplement  
© Author(s) 2015. CC Attribution 3.0 License.

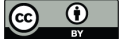

*Supplement of*

## **Model study of the impacts of future climate change on the hydrology of Ganges–Brahmaputra–Meghna basin**

**M. Masood et al.**

*Correspondence to:* M. Masood (masood35bd@yahoo.com)

# 1 **Supplement Information**

2

## 3 **Supplement Information S1: Comparison of WFD and APHRODITE** 4 **dataset**

5

6 The WATCH forcing dataset (WFD) provides seven forcing variables: precipitation,  
7 specific humidity, air temperature, surface pressure, wind speed, downward shortwave  
8 radiation and downward long-wave radiation and the APHRODITE only provides  
9 precipitation and temperature. Spatial distribution of annual (1988) precipitation of the WFD  
10 and the APHRODITE over entire GBM basin and difference between two data are shown in  
11 Fig. S1.

12

13 We have simulated our hydrological model H08 by using the APHRODITE  
14 precipitation and temperature data to compare the model output with that of using WFD  
15 dataset. We found the simulation using APHRODITE precipitation and temperature data  
16 (other metrological variables are taken from WFD) does not give better simulation results  
17 than the simulation using WFD (simulation result presented in Table S1). Time series plot of  
18 simulated discharge using both (i) complete dataset from the WFD and (ii) combination of  
19 precipitation and temperature data from the APHRODITE dataset and other metrological  
20 variables from the WFD is shown in Fig. S2.

21

22

23

24

25

26

27

28

29

30

31

32

1 **Supplement Table**

2

3 Supplement Table S1: Result obtained from two different simulations (1988) using the  
4 APHRODITE and the WFD precipitation data (unit: mm year<sup>-1</sup>)

5

6

|           |             | Rainfall | Snowfall | Total runoff | ET  |
|-----------|-------------|----------|----------|--------------|-----|
| APHRODITE | Entire GBM  | 1 171    | 27       | 664          | 524 |
|           | Brahmaputra | 1 252    | 9        | 852          | 424 |
|           | Ganges      | 959      | 27       | 442          | 537 |
| WFD       | Entire GBM  | 1 555    | 27       | 1 034        | 538 |
|           | Brahmaputra | 1 819    | 16       | 1 430        | 426 |
|           | Ganges      | 1 178    | 18       | 627          | 565 |

7

8

9

10

11

12

13

14

15

16

17

18

19

20

21

22

23

24

# 1 Supplement Figure

(a) APHRODITE ( $\text{mm year}^{-1}$ )

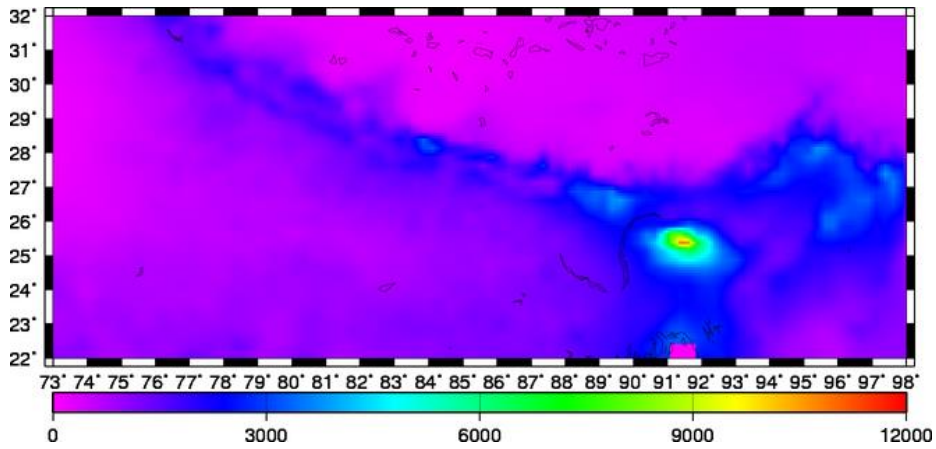

(b) WFD ( $\text{mm year}^{-1}$ )

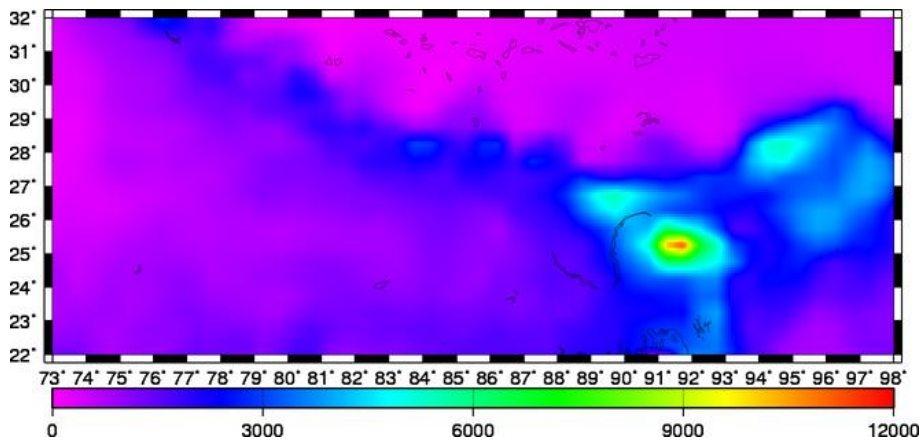

(c) WFD - APHRODITE ( $\text{mm year}^{-1}$ )

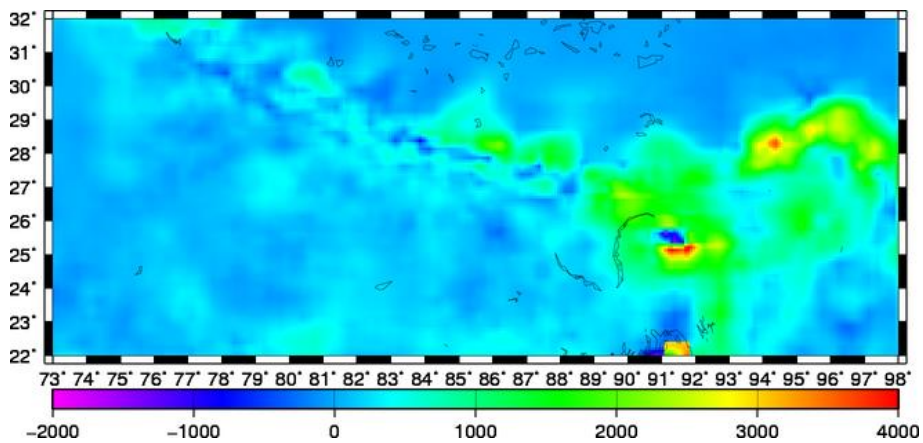

2

3 Supplement Figure S1 Spatial distribution of annual (1988) precipitation of the (a) WFD and  
4 the (b) APHRODITE over entire GBM basin and (c) difference between two data.

1

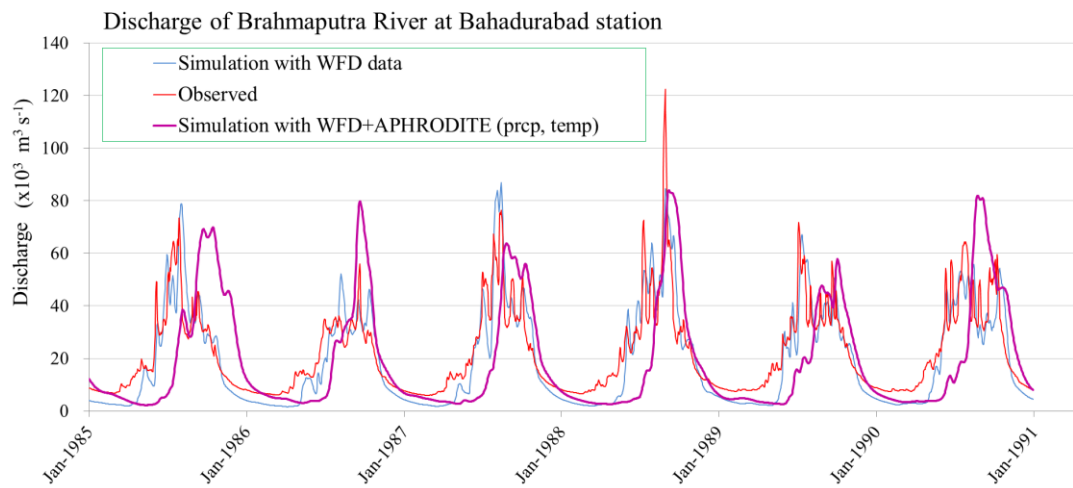

2

3 Supplement Figure S2 Time series plot of simulated discharge using both (i) complete dataset  
4 from the WFD and (ii) combination of precipitation and temperature data from the  
5 APHRODITE dataset and other metrological variables from the WFD

6

7

8

9
